# Supplementary material
Source: PubMed Central journal article supplement (PMC4362812)

**Raw Treated**

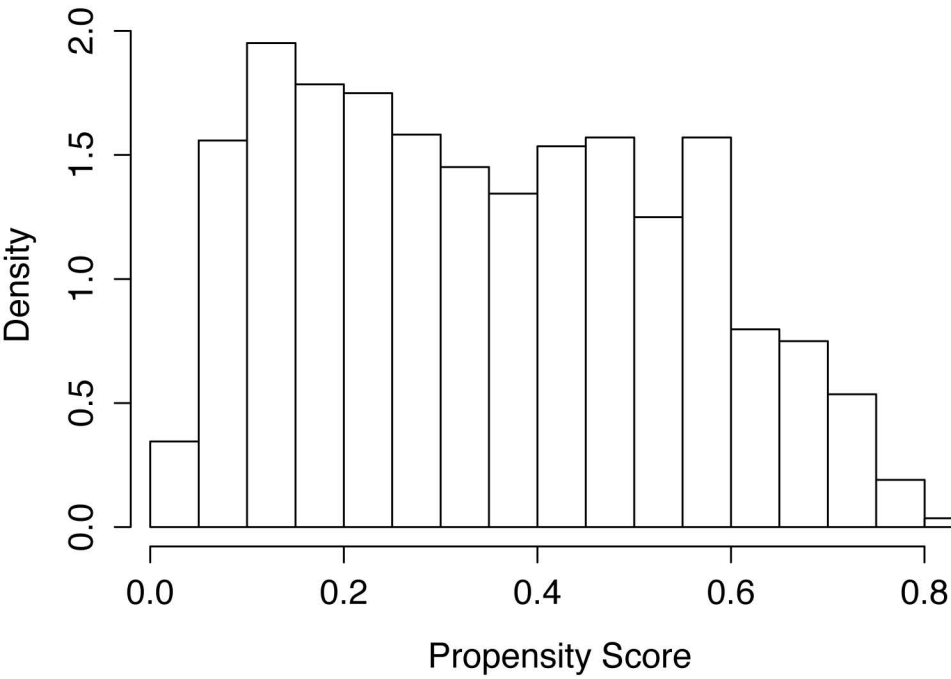

**Matched Treated**

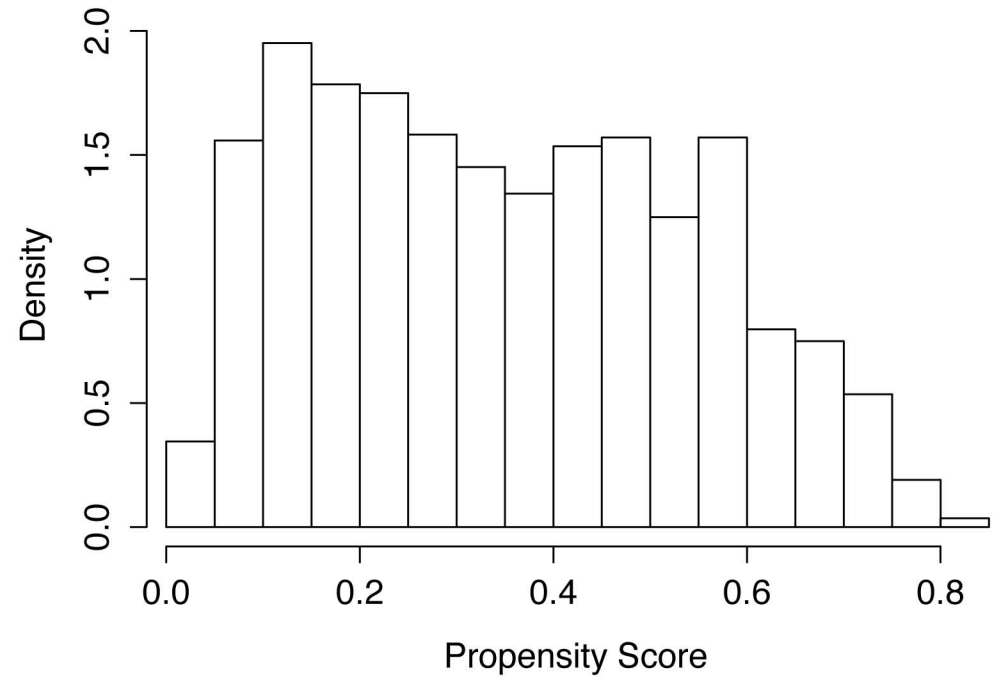

**Raw Control**

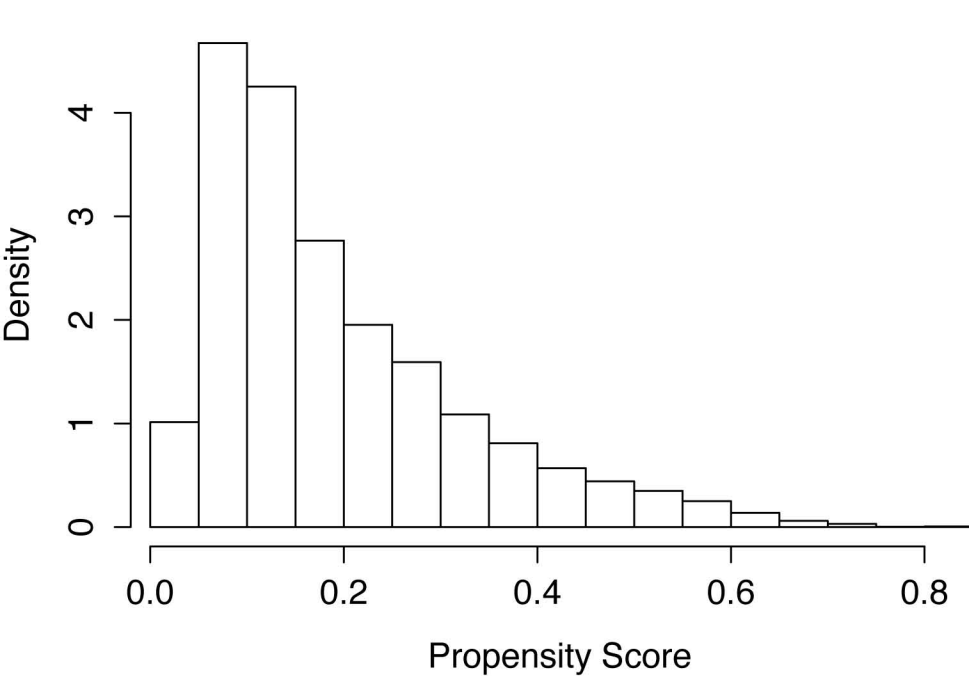

Propensity match

**Matched Control**

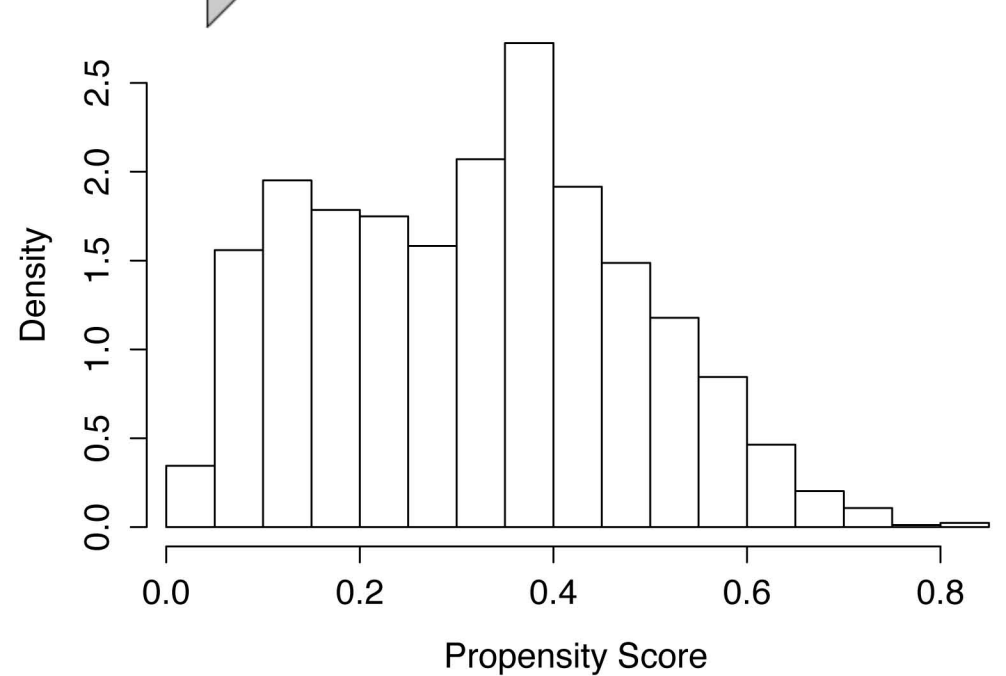

# Distribution of Propensity Scores

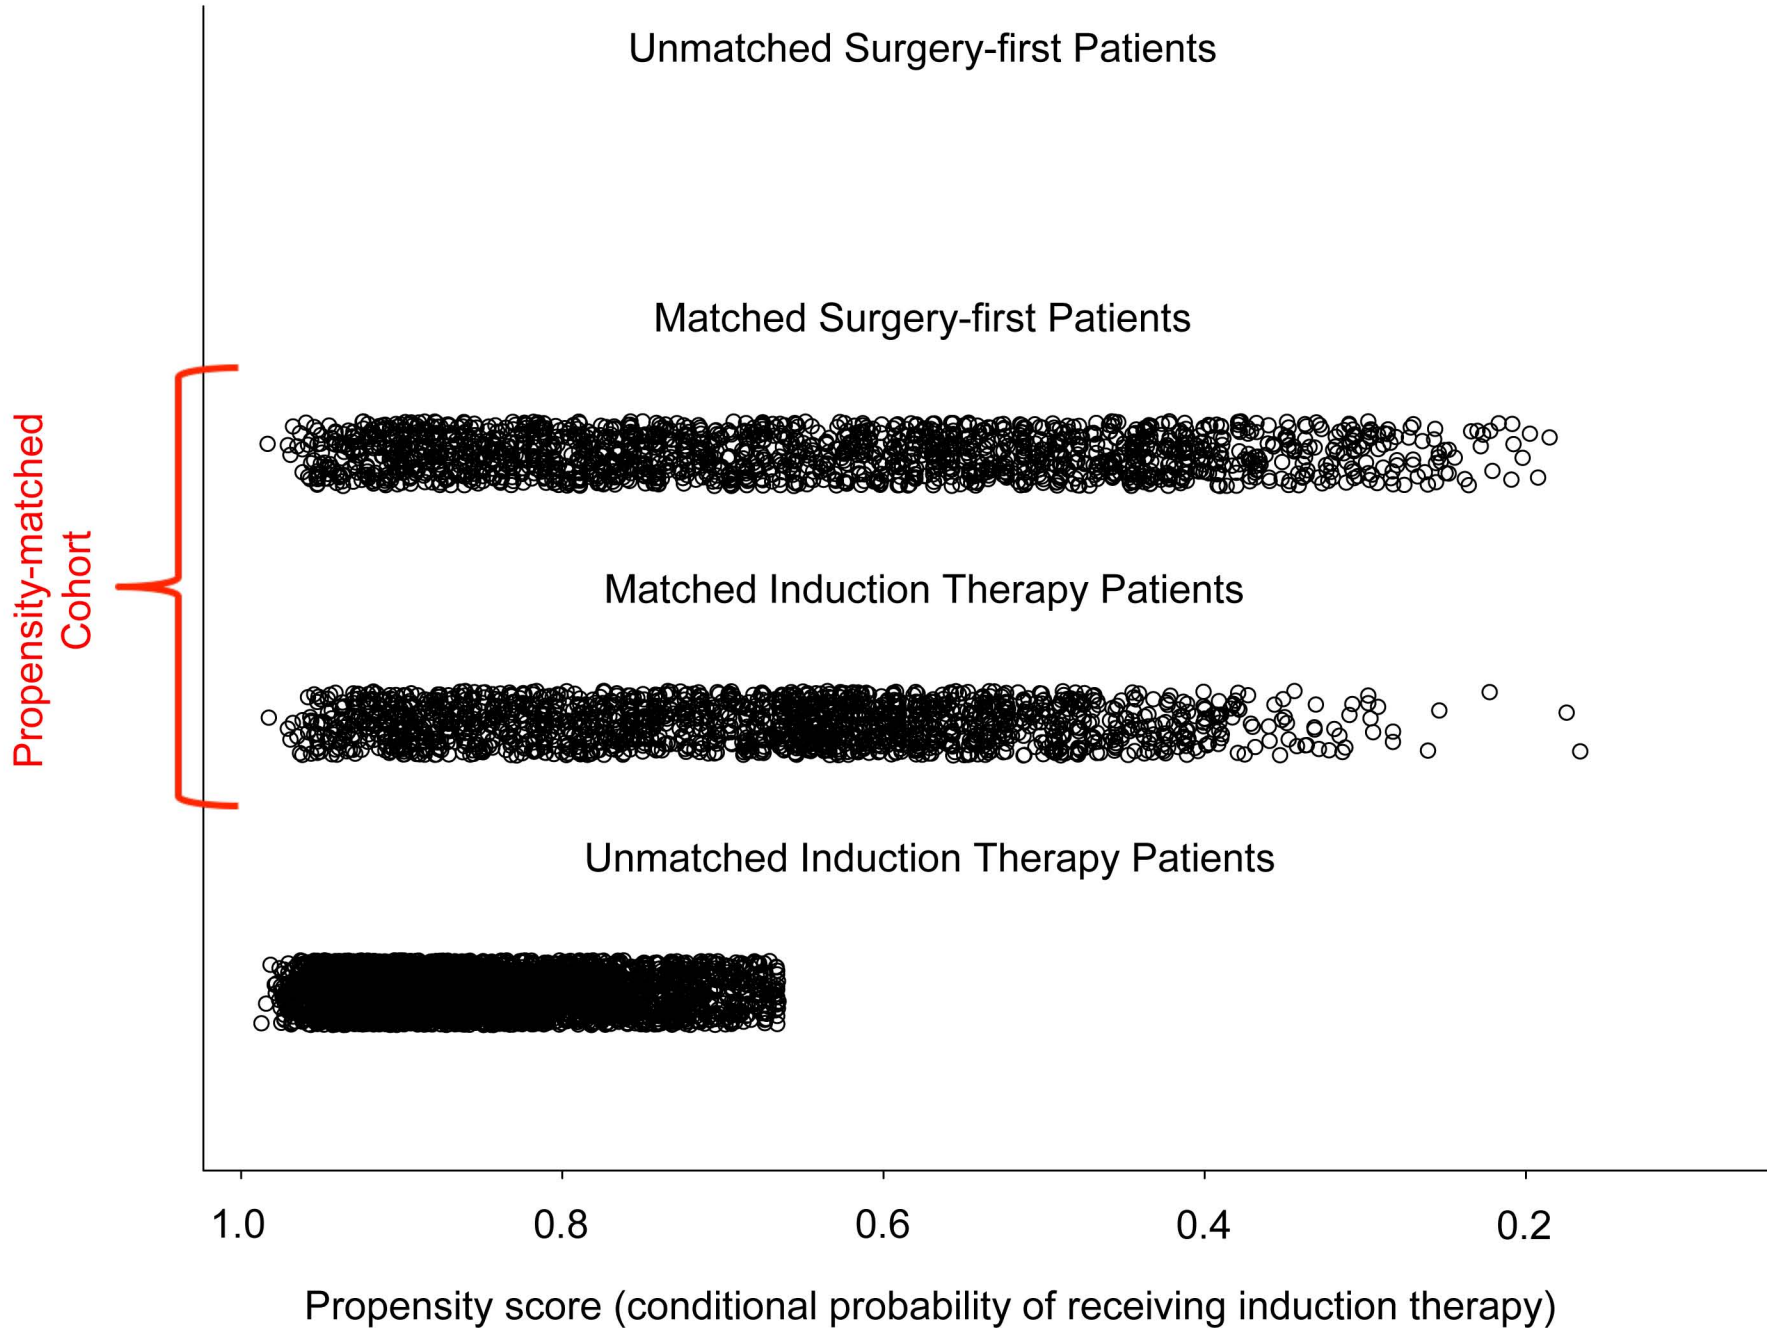

Supplement: NIHMS623683-supplement-Supp_FigureS1A-B.pdf [file NIHMS623683-supplement-Supp_FigureS1A-B.pdf]
